Articles of interest in other COB journals

From *Journal of Cell Science*

**Microcephalin coordinates mitosis in the syncytial *Drosophila* embryo**

Kathrin Brunk, Bertrand Vernay, Elen Griffith, Natalie L. Reynolds, David Strutt, Philip W. Ingham and Andrew P. Jackson

Brunk, K. et al. 2007. *J. Cell Sci.* doi:10.1242/jcs.014290

**Promotion of lens epithelial-fiber differentiation by the C-terminus of connexin 45.6 – a role independent of gap junction communication**

Eric A. Banks, X. Sean Yu, Qian Shi and Jean X. Jiang

Banks, E. A. et al. 2007. *J. Cell Sci.* doi:10.1242/jcs.000935
